# Supplementary material for: Synthesis of mild–hard AAO templates for studying magnetic interactions between metal nanowires
Source: Royal Society of Chemistry journal article supplement (doi:10.1039/c0jm01365j), 2010-01-01

## Supplementary Data

Contains summary of literature of those working on alumina membrane fabrication by anodization (Table S1) and some TEM/SAED results on nickel and cobalt nanowires (Figures S1 and S2).

**Table S1.** Various AAO membranes synthesized under different anodization conditions.

| Author                          | Electrolyte                                                                                                                       | Voltage or Current density | Temperature | Structure          | Note                                                                                                       |
|---------------------------------|-----------------------------------------------------------------------------------------------------------------------------------|----------------------------|-------------|--------------------|------------------------------------------------------------------------------------------------------------|
| C. Shuoshuo et al. <sup>4</sup> | 0.3 M H <sub>2</sub> C <sub>2</sub> O <sub>4</sub>                                                                                | 50 to 50√n V               | 0~5 °C      | Round              | Voltage decreasing: branched channels                                                                      |
|                                 | 0.3 M H <sub>2</sub> C <sub>2</sub> O <sub>4</sub>                                                                                | 50√n to 50 V               | 0~5 °C      | Round              | Voltage increasing: terminated channels                                                                    |
| S. Zhao et al. <sup>5</sup>     | 0.8 M H <sub>2</sub> SO <sub>4</sub> + 0.1 M Al <sub>2</sub> (SO <sub>4</sub> ) <sub>3</sub>                                      | 160 mA/cm <sup>2</sup>     | 1 °C        | Six-membered rings | Diameter: 15 nm<br>Interpore distance: 50nm                                                                |
| H. Masuda et al. <sup>6</sup>   | 0.3M H <sub>2</sub> C <sub>2</sub> O <sub>4</sub>                                                                                 | 40 V                       | 17 °C       | Rectangular        | Interpore distance: 100-200 nm<br>Al substrates were oil pressed with SiC molds at 1600 kg/cm <sup>2</sup> |
|                                 | 0.5 M H <sub>3</sub> PO <sub>4</sub>                                                                                              | 80 V                       | 17 °C       | Triangular         |                                                                                                            |
| Y. B. Li et al. <sup>7</sup>    | H <sub>2</sub> C <sub>2</sub> O <sub>4</sub> + C <sub>2</sub> H <sub>5</sub> OH+H <sub>2</sub> O                                  | 100~180 V                  | -10~0 °C    | Round              | Interpore distance: 225-450 nm                                                                             |
|                                 | H <sub>2</sub> SO <sub>4</sub> + H <sub>2</sub> C <sub>2</sub> O <sub>4</sub> + C <sub>2</sub> H <sub>5</sub> OH+H <sub>2</sub> O | 30~80 V                    | -5~0 °C     | Round              | Interpore distance: 70-140 nm                                                                              |
| W. Lee et al. <sup>8</sup>      | 0.3 M H <sub>2</sub> C <sub>2</sub> O <sub>4</sub>                                                                                | 100 ~160 V                 | 1~2 °C      | Round              | Interpore distance: 200-300 nm                                                                             |

Reference numbers correspond to those in main text.

**Figure S1.** TEM images of Ni nanowires synthesized in (a) mild side, (b) hard side of Mi-Ha AAO and (c) Mi-AAO. Insets are SAED patterns.

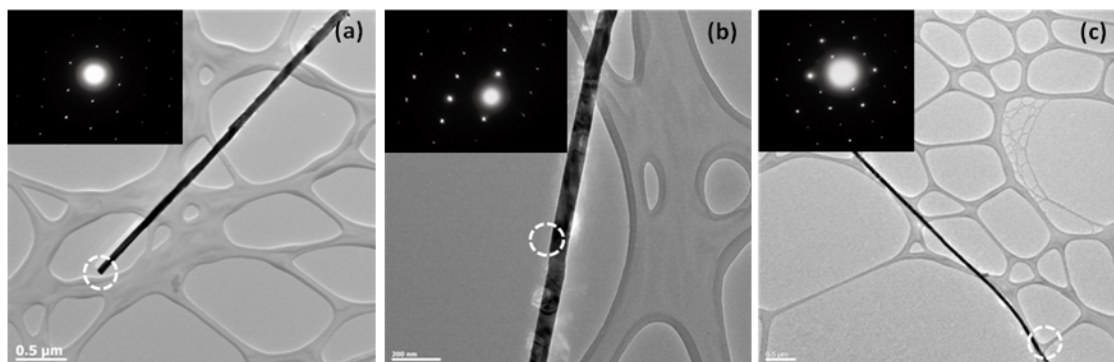

**Figure S2.** TEM images of Co nanowires synthesized in (a) mild side, (b) hard side of Mi-Ha AAO and (c) Mi-AAO. Insets are SAED patterns.

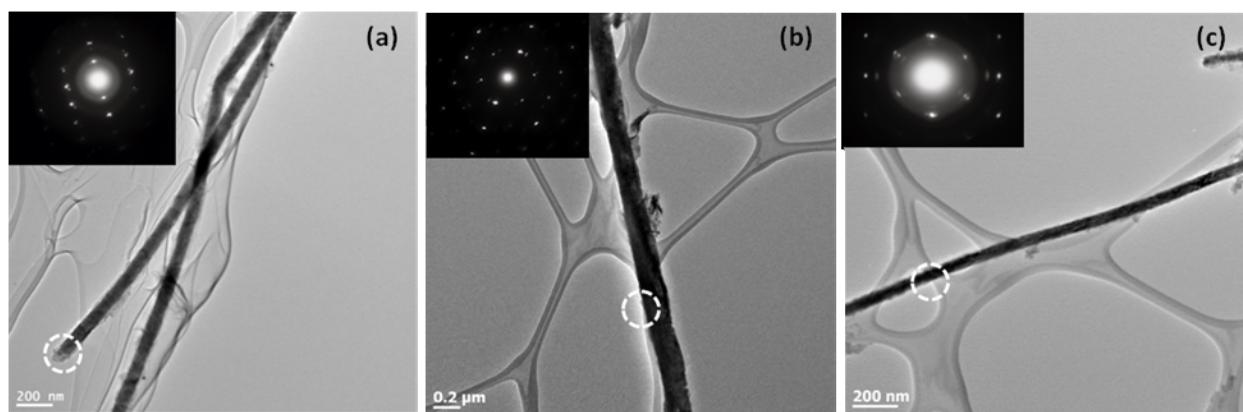

Supplement: c0jm01365j.pdf [file c0jm01365j.pdf]
